# Supplementary material
Source: PubMed Central journal article supplement (PMC4749445)
Supplement: NIHMS735966-supplement-1.pdf [file NIHMS735966-supplement-1.pdf]

# Inventory of Supplemental Data

## 1) Supplemental Figures

Figure S1: Supplement to Figure 1

Cell surface phenotype of  $Zfp423/GFP^+$ ;  $Lin^-$  adipose stromal cells; representative FACS collection gates; effect of fetal bovine serum (FBS) on adipogenic potential of  $GFP^+$  and  $GFP^-$  mural cells.

Figure S2: Supplement to Figure 2.

Frequency of  $Zfp423$ -expressing adipose mural cells after eight weeks of chow or high-fat diet feeding.

Figure S3: Supplement to Figure 3.

Generation and characterization of  $Pdgfr\beta^{tTA}$  transgenic mice; inactivation of  $Zfp423$  in cultured  $Pdgfr\beta^+$  SVF cells.

Figure S4: Supplement to Figure 4

*De novo* differentiation of beige adipocytes in iWAT occurs upon cold exposure

## 2) Supplemental Figure Legends

## 3) Supplemental Tables

Table S1: Related to Figure 1

Genes With Elevated Expression in  $Zfp423/GFP^+$  Mural Cells

Table S2: Related to Figure 1

Genes With Elevated Expression in  $Zfp423/GFP^-$  Mural Cells

Table S3: Related to Figure 1

Top 20 Gene sets Enriched in  $Zfp423/GFP^+$  Mural Cells

Table S4: Related to Figure 1

Top 20 Gene Sets Enriched in  $Zfp423/GFP^-$  Mural Cells

## 4) Supplemental Experimental Procedures

## 5) Supplemental References
